# Supplementary material for: Theoretical investigation of electrochemical behavior of DTPA and its interfacial synergy with defected graphene toward photocatalytic applications
Source: Royal Society of Chemistry journal article supplement (doi:10.1039/d6ra02766k), 2026-05-26
Supplement: d6ra02766k1.pdf [file d6ra02766k1.pdf]

## **Theoretical Investigation of Electrochemical Behavior of DTPA and Its Interfacial Synergy with Defected Graphene toward Photocatalytic Applications**

Chinh Dung Trinh<sup>1,2</sup>, Thi Long Do<sup>3</sup>, Tam Van Nguyen<sup>4</sup>, Ngan Nguyen Le<sup>5,6</sup>, Duong Nguyen Nguyen<sup>5,6\*</sup>

1 – Laboratory of Advanced Materials Chemistry, Institute for Advanced Study in Technology, Ton Duc Thang University, Ho Chi Minh City, Vietnam

2 – Faculty of Applied Sciences, Ton Duc Thang University, Ho Chi Minh City, Vietnam

3 – Faculty of Chemical Engineering, Industrial University of Ho Chi Minh City, Ho Chi Minh City, Vietnam

4 – Institute of Advanced Technology and Artificial Intelligence, Hung Vuong University of Ho Chi Minh City, Vietnam

5 – Institute of Applied Science and Technology, Van Lang School of Technology, Van Lang University, Ho Chi Minh City, Vietnam

6 – Faculty of Applied Technology, Van Lang School of Technology, Van Lang University, Ho Chi Minh City, Vietnam

Correspondence: Duong Nguyen Nguyen ([nguyen.nd@vlu.edu.vn](mailto:nguyen.nd@vlu.edu.vn)); +84 798 740 848

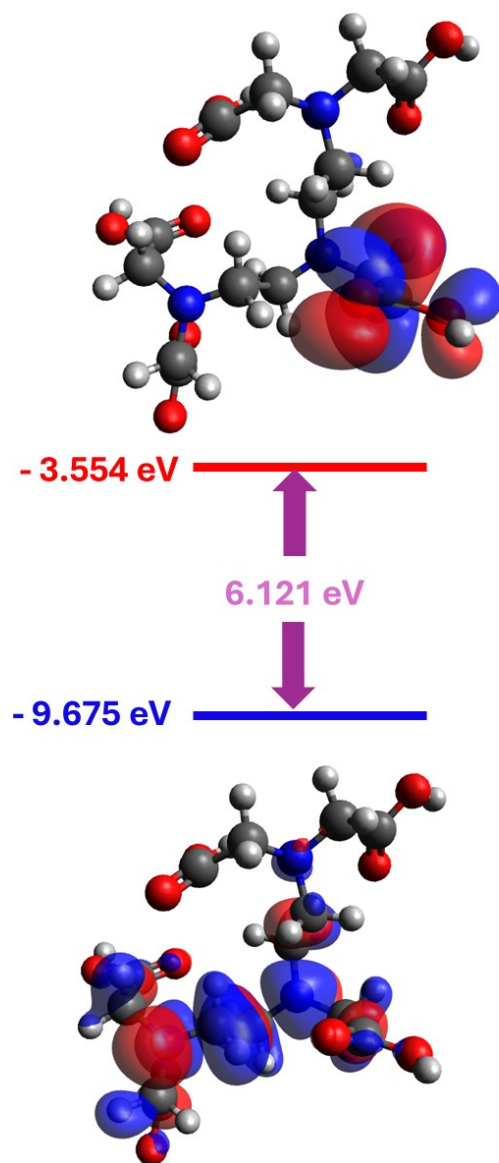

**Figure S1.** Calculated frontier orbital energies (SOMO and LUMO) and SOMO–LUMO gap of the DTPA molecule in radical cationic state.

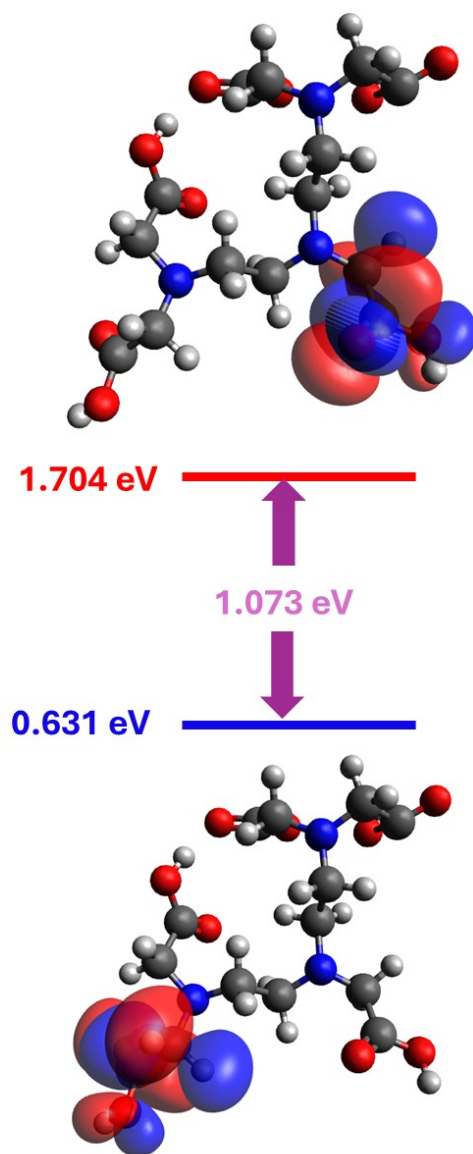

**Figure S2.** Calculated frontier orbital energies (SOMO and LUMO) and SOMO–LUMO gap of the DTPA molecule in radical anionic state.

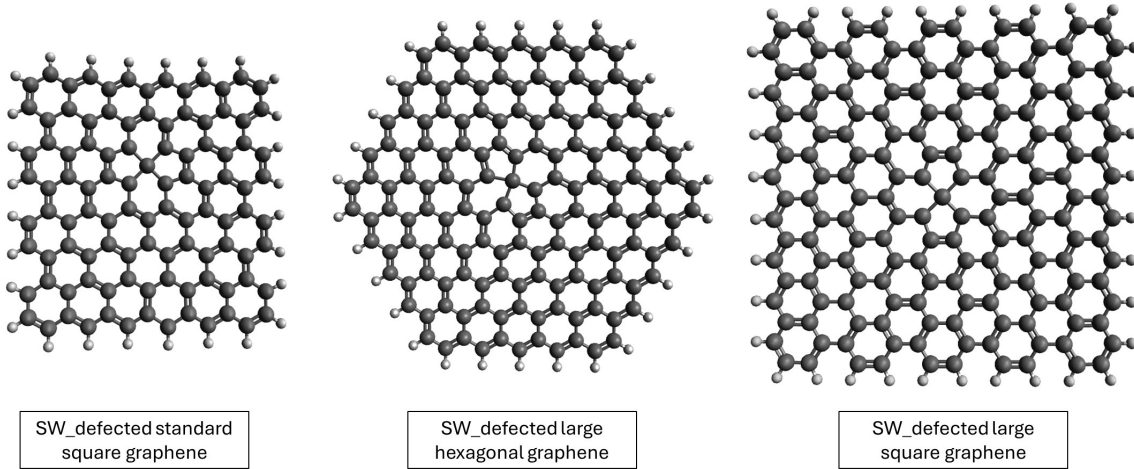

**Figure S3.** Finite graphene cluster models used for the convergence tests

**Table S1.** Spin expectation values  $\langle S^2 \rangle$  for neutral and charged states of DTPA.

| State        | Multiplicity | Ideal $\langle S^2 \rangle$ | Calculated $\langle S^2 \rangle$ | Deviation (%) |
|--------------|--------------|-----------------------------|----------------------------------|---------------|
| Neutral      | Singlet      | 0.00                        | 0.00                             | 0.0           |
| Cation+<br>1 | Doublet      | 0.75                        | 0.76                             | 1.3           |
| Cation+<br>2 | Singlet      | 0.00                        | 0.00                             | 0.0           |
| Cation+<br>3 | Doublet      | 0.75                        | 0.78                             | 4.0           |
| Anion-1      | Doublet      | 0.75                        | 0.76                             | 1.3           |
| Anion-2      | Singlet      | 0.00                        | 0.00                             | 0.0           |
| Anion-3      | Doublet      | 0.75                        | 0.80                             | 6.7           |

**Table S2.** CPCM solvation parameters for DTPA in water, ethanol, DMF, and acetonitrile, accompanied by the corresponding single point energies

|        | Single Point<br>Energy (eV) | CPCM parameter         |                                    |                                  |                                   |
|--------|-----------------------------|------------------------|------------------------------------|----------------------------------|-----------------------------------|
|        |                             | Surface<br>charge (eV) | Outlying charge<br>correction (eV) | Cavitation+<br>dispersion (eV) * | Dielectric<br>interaction<br>(eV) |
| vacuum | -39832.0714                 | —                      | —                                  | —                                | —                                 |
| water  | -39833.7786                 | -0.07985               | 0.00891                            | 0.45851                          | -2.9632                           |
| EtOH   | -39833.7875                 | -0.06253               | 0.00524                            | 0.29406                          | -2.66705                          |
| DMF    | -39833.6076                 | -0.01768               | 0.00038                            | -0.44443                         | -1.40447                          |
| ACN    | -39833.5344                 | -0.02058               | 0.00053                            | -0.20213                         | -1.62183                          |

Note: \* - The sign of the cavitation + dispersion term depends on whether cavitation (positive) or dispersion attraction (negative) dominates for the given solute–solvent pair.

**Table S3.** Static electric properties of DTPA in vacuum and various solvents (water, ethanol, DMF, acetonitrile).

|               | <b>Static Polarizability Tensor (a.u.)</b> |               | <b>Quadrupole Moment (a.u.)</b> | <b>Dipole Moment (Debye)</b> |
|---------------|--------------------------------------------|---------------|---------------------------------|------------------------------|
|               | Quad./Quad.                                | Dipole/Dipole |                                 |                              |
| <b>vacuum</b> | 11849                                      | 221.04973     | -118.949006                     | 4.7923                       |
| <b>water</b>  | 15980                                      | 307.33502     | -120.386379                     | 7.9635                       |
| <b>EtOH</b>   | 15536                                      | 302.20891     | -119.972433                     | 7.6762                       |
| <b>DMF</b>    | 14607                                      | 289.32835     | -119.713746                     | 6.8565                       |
| <b>ACN</b>    | 14774                                      | 292.1804      | -119.561643                     | 7.0384                       |

**Table S4.** Calculated Proton Affinity (PA) and neutralization energy for DTPA anionic states in aqueous phase.

| <b>Protonation Process</b>                 | <b><math>\Delta G_{\text{solv}}</math><br/>(kcal/mol)</b> | <b><math>\Delta G_{\text{solv}}</math> (eV)</b> | <b>Tendency for<br/>PCET</b> |
|--------------------------------------------|-----------------------------------------------------------|-------------------------------------------------|------------------------------|
| <b>Anion-1 + H<sup>+</sup> → Neutral</b>   | -285.4                                                    | -12.37                                          | Moderate                     |
| <b>Anion-2 + H<sup>+</sup> → Anion-1-H</b> | -352.1                                                    | -15.27                                          | High                         |
| <b>Anion-3 + H<sup>+</sup> → Anion-2-H</b> | -418.6                                                    | -18.15                                          | Very High                    |

Note: PA values are calculated as the Gibbs free energy change of the protonation step in water. Higher absolute values indicate a stronger thermodynamic driving force for capturing a proton.

**Table S5.** Static electric parameters and relative single point energies of DTPA anion and cation in water environment with respect to the neutral molecule.

|               | <b>Dipole<br/>Moment<br/>(Debye)</b> | <b>Single<br/>Point<br/>Energy<br/>(eV)</b> | <b>CPCM parameter</b>  |                                       |                                   |                                   |
|---------------|--------------------------------------|---------------------------------------------|------------------------|---------------------------------------|-----------------------------------|-----------------------------------|
|               |                                      |                                             | Surface<br>charge (eV) | Outlying<br>charge<br>correction (eV) | Cavitation+<br>dispersion<br>(eV) | Dielectric<br>interaction<br>(eV) |
| <b>Anion</b>  | 16.357                               | -1.5078                                     | 0.9883                 | 0.0028                                | -0.069                            | -1.888                            |
| <b>Cation</b> | 7.463                                | 5.0409                                      | -0.99                  | -0.002                                | 0.0647                            | -1.832                            |

**Table S6.** Spin expectation values  $\langle S^2 \rangle$  for neutral and charged states of materials.

| System                          | Multiplicity | $\langle S^2 \rangle$ | Magnetic moment* ( $\mu\text{B}$ ) | Spin state     |
|---------------------------------|--------------|-----------------------|------------------------------------|----------------|
| Pristine graphene               | Singlet      | 0.00                  | 0.00                               | Non-magnetic   |
| SW_graphene                     | Singlet      | 0.00                  | 0.00                               | Non-magnetic   |
| V <sub>1</sub> -graphene        | Triplet      | 2.02                  | 2.00                               | Magnetic (S=1) |
| V <sub>1</sub> -graphene + DTPA | Singlet      | 0.00                  | 0.00                               | Quenched       |
| SW_graphene + DTPA              | Singlet      | 0.00                  | 0.00                               | Non-magnetic   |
| Pris_graphene + DTPA            | Singlet      | 0.00                  | 0.00                               | Non-magnetic   |

Note: \* - The magnetic moment ( $\mu\text{B}$ ) is derived from the integrated spin density

*The isolated single-vacancy defect (V<sub>1</sub>-) exhibits a triplet ground state with a magnetic moment of 2.00  $\mu\text{B}$ , consistent with previous theoretical studies (Palacios et al., Vacancy-induced magnetism in graphene and graphene ribbons, Phys. Rev. B 2008). Upon adsorption of DTPA, the magnetic moment is completely quenched due to charge transfer and orbital hybridization between the vacancy site and the DTPA molecule. No spin contamination is observed ( $\langle S^2 \rangle$  values are within 0.02 of the ideal). The SW and pristine models remain non-magnetic throughout.*

**Table S7.** Convergence of Adsorption Energy and Electronic Properties for DTPA on SW-Defected Graphene Clusters.

| <b>Cluster Model</b>   | <b>Shape</b> | <b>No. of C / H</b> | <b>E<sub>ads</sub> (eV)</b> | <b>Deviation</b> | <b>E<sub>gap</sub> (eV)</b> |
|------------------------|--------------|---------------------|-----------------------------|------------------|-----------------------------|
| <b>Standard Square</b> | Square       | 103 / 28            | -1.124                      | Reference        | 2.24                        |
| <b>Large Hexagonal</b> | Hexagonal    | 149 / 30            | -1.144                      | 1.80%            | 2.21                        |
| <b>Large Square</b>    | Square       | 169 / 36            | -1.153                      | 2.60%            | 2.19                        |

**Table S8.** The calculated electronic transition of pristine DTPA in water: excitation energy, maximum absorption wavelength, oscillator strength, and transition dipole moment.

| <b>Excited State</b> | <b>Energy (eV)</b> | <b>Wavelength (nm)</b> | <b>f</b> | <b>Transition dipole moment (a.u.)</b> |
|----------------------|--------------------|------------------------|----------|----------------------------------------|
| <b>S1</b>            | 4.929475           | 251.5                  | 0.000224 | 0.043012                               |
| <b>S2</b>            | 5.018202           | 247.1                  | 0.010473 | 0.291873                               |
| <b>S3</b>            | 5.043458           | 245.8                  | 0.002744 | 0.14903                                |
| <b>S4</b>            | 5.120079           | 242.2                  | 0.001775 | 0.118954                               |
| <b>S5</b>            | 5.218743           | 237.6                  | 0.002315 | 0.134573                               |
| <b>S6</b>            | 5.31544            | 233.3                  | 0.000745 | 0.075631                               |
| <b>S7</b>            | 5.371793           | 230.8                  | 0.000898 | 0.082583                               |
| <b>S8</b>            | 5.441              | 227.9                  | 0.001145 | 0.092682                               |
| <b>S9</b>            | 5.496837           | 225.6                  | 0.001568 | 0.107935                               |
| <b>S10</b>           | 5.542205           | 223.7                  | 0.003138 | 0.15202                                |
| <b>S11</b>           | 5.613812           | 220.9                  | 0.001447 | 0.102567                               |
| <b>S12</b>           | 5.7563             | 215.4                  | 0.003708 | 0.162142                               |
| <b>S13</b>           | 5.807482           | 213.5                  | 0.008259 | 0.240936                               |
| <b>S14</b>           | 5.827926           | 212.7                  | 0.002721 | 0.138058                               |
| <b>S15</b>           | 5.84145            | 212.2                  | 0.000793 | 0.074431                               |

**Table S9.** The calculated electronic transition of pristine DTPA@pris\_graphene in water: excitation energy, maximum absorption wavelength, oscillator strength, and transition dipole moment.

| Excited State | Energy (eV) | Wavelength (nm) | f        | Transition dipole moment (a.u.) |
|---------------|-------------|-----------------|----------|---------------------------------|
| S1            | 1.616301    | 767.1           | 0.048908 | 1.111346                        |
| S2            | 2.019027    | 614.1           | 0.174122 | 1.876193                        |
| S3            | 2.487802    | 498.4           | 0.000141 | 0.048166                        |
| S4            | 2.619492    | 473.3           | 0.05648  | 0.93812                         |
| S5            | 2.824601    | 438.9           | 0.002118 | 0.174957                        |
| S6            | 2.874088    | 431.4           | 0.016045 | 0.477347                        |
| S7            | 3.120679    | 397.3           | 0.04823  | 0.794242                        |
| S8            | 3.538841    | 350.4           | 0.010155 | 0.342243                        |
| S9            | 3.665296    | 338.3           | 0.001528 | 0.130422                        |
| S10           | 3.907622    | 317.3           | 2.87E-05 | 0.017321                        |
| S11           | 4.012643    | 309             | 0.001894 | 0.138816                        |
| S12           | 4.202994    | 295             | 0.000923 | 0.094657                        |
| S13           | 4.426006    | 280.1           | 0.000863 | 0.089219                        |
| S14           | 4.700222    | 263.8           | 0.001778 | 0.124258                        |
| S15           | 4.966134    | 249.7           | 0.000225 | 0.043012                        |

**Table S10.** The calculated electronic transition of pristine DTPA@SW\_graphene in water: excitation energy, maximum absorption wavelength, oscillator strength, and transition dipole moment.

| <b>Excited State</b> | <b>Energy (eV)</b> | <b>Wavelength (nm)</b> | <b>f</b> | <b>Transition dipole moment (a.u.)</b> |
|----------------------|--------------------|------------------------|----------|----------------------------------------|
| <b>S1</b>            | 0.787866           | 1573.7                 | 6.27E-05 | 0.057009                               |
| <b>S2</b>            | 1.045562           | 1185.8                 | 0.006816 | 0.515839                               |
| <b>S3</b>            | 1.495965           | 828.8                  | 0.000774 | 0.145362                               |
| <b>S4</b>            | 1.641908           | 755.1                  | 0.000168 | 0.064653                               |
| <b>S5</b>            | 1.706671           | 726.5                  | 0.004338 | 0.322102                               |
| <b>S6</b>            | 1.785043           | 694.6                  | 0.009962 | 0.477274                               |
| <b>S7</b>            | 2.18206            | 568.2                  | 0.003851 | 0.268403                               |
| <b>S8</b>            | 2.476527           | 500.6                  | 0.011231 | 0.430244                               |
| <b>S9</b>            | 2.727646           | 454.5                  | 0.026757 | 0.632764                               |
| <b>S10</b>           | 3.093597           | 400.8                  | 0.029491 | 0.623779                               |
| <b>S11</b>           | 3.157027           | 392.7                  | 0.011329 | 0.382714                               |
| <b>S12</b>           | 3.258904           | 380.4                  | 0.019707 | 0.49681                                |
| <b>S13</b>           | 3.380011           | 366.8                  | 0.019096 | 0.480219                               |
| <b>S14</b>           | 3.536667           | 350.6                  | 2.87E-05 | 0.018166                               |
| <b>S15</b>           | 3.63202            | 341.4                  | 3.89E-05 | 0.020976                               |
